# Supplementary material for: Non-close-packed hexagonal self-assembly of Janus nanoparticles on planar membranes
Source: Royal Society of Chemistry journal article supplement (doi:10.1039/d3sm00984j), 2023-01-01
Supplement: d3sm00984j1.pdf [file d3sm00984j1.pdf]

## Supporting Information: Non-Close-Packed Hexagonal Self-Assembly of Janus Nanoparticles on Planar Membranes

Yu Zhu, Abash Sharma, Eric J. Spangler, and Mohamed Laradji<sup>a</sup>

<sup>1</sup>Department of Physics and Materials Science, The University of Memphis, Memphis, TN 38152, USA

### SI. JANUS NANOPARTICLE MODEL

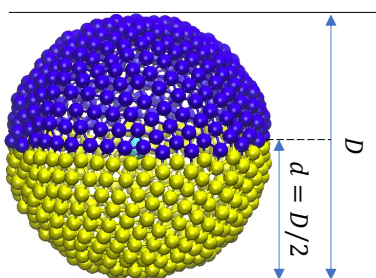

FIG. S1. Configuration of an equilibrated spherical Janus NP with  $D = 20$  nm.  $a$  beads are yellow, and tend to adhere to the lipid membrane,  $b$  beads are blue and interact repulsively with the lipid beads. The cyan  $c$ -bead, at the center of NP, and is connected to all other beads by harmonic bonds (not shown for clarity) to maintain a spherical shape of the Janus NP. In this case, the Janusity  $J = d/D = 0.5$ , where  $d$  is the height of the spherical cap that interacts attractively with the lipid head beads.

### SII. RELATIONSHIP BETWEEN $\xi$ AND $\mathcal{E}$

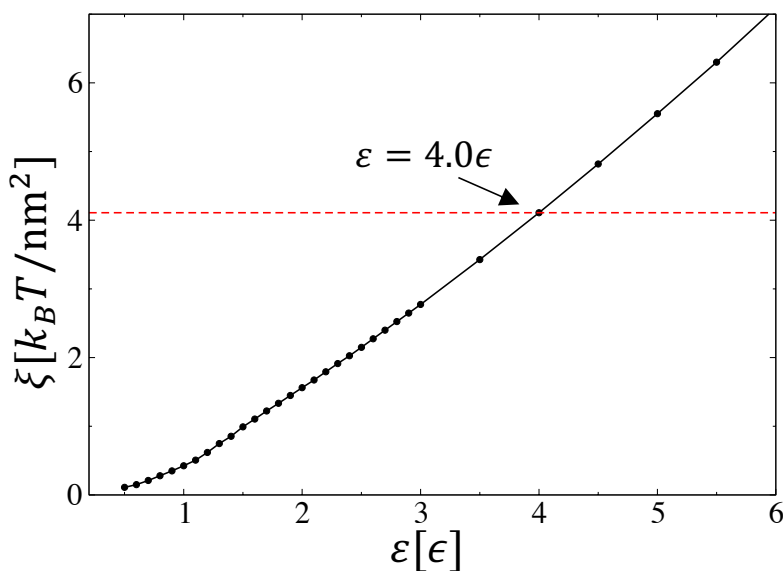

FIG. S2. The adhesion energy density,  $\xi$ , versus the interaction strength,  $\mathcal{E}$ , between a NP  $n_a$ -bead and a lipid  $h$ -bead. The red line indicates that the energy density  $\xi = 4.11k_B T / nm^2$  corresponds to  $\mathcal{E} = 4.0\epsilon$ .

<sup>a</sup> mlaradji@memphis.edu

### SIII. RADIAL DISTRIBUTION FUNCTION AT DIFFERENT VALUES OF THE ADHESION STRENGTH

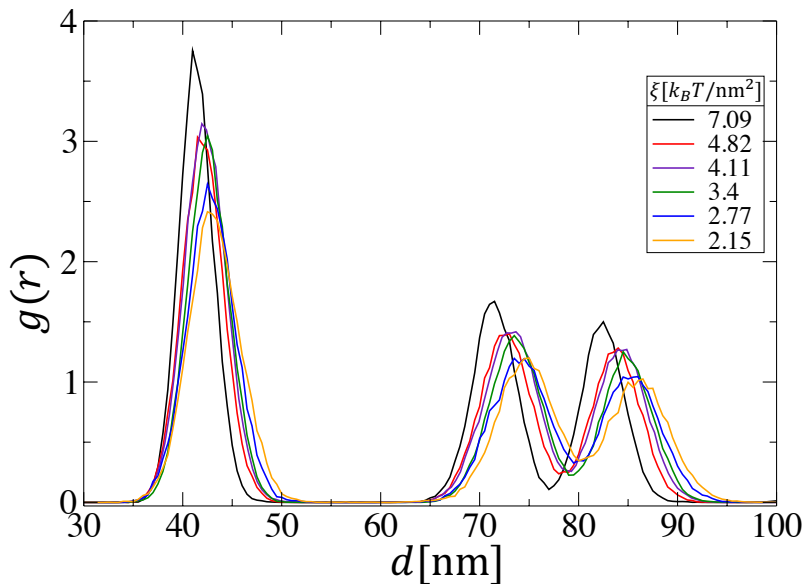

FIG. S3. Radial distribution function of the JNPs' centers at different values of  $\xi$ . This figure demonstrates that at high values of  $\xi$ , the effect of adhesion strength on the hexagonal order of the JNPs is weak.

### SIV. ENDOCYTOSIS AND SELF-ASSEMBLY OF THE JNPS AT HIGH DENSITIES

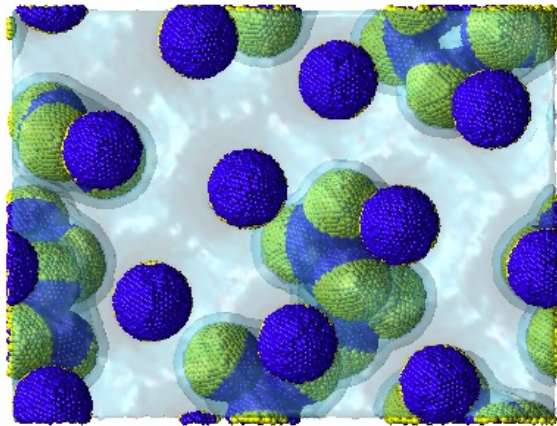

FIG. S4. An equilibrium snapshot in the case of an initial high density of the JNPs on the membrane, corresponding to  $\rho = 5.91 \times 10^{-4} \text{ nm}^{-2}$ . Some of the JNPs cluster then endocytosis. The remaining JNPs are self-assembled into a triangular lattice. Here  $\xi = 4.11 k_B T / \text{nm}^2$ .
